# Supplementary material
Source: PubMed Central journal article supplement (PMC4836392)
Supplement: NIHMS775987-supplement-1.pdf [file NIHMS775987-supplement-1.pdf]

**Figure S1**

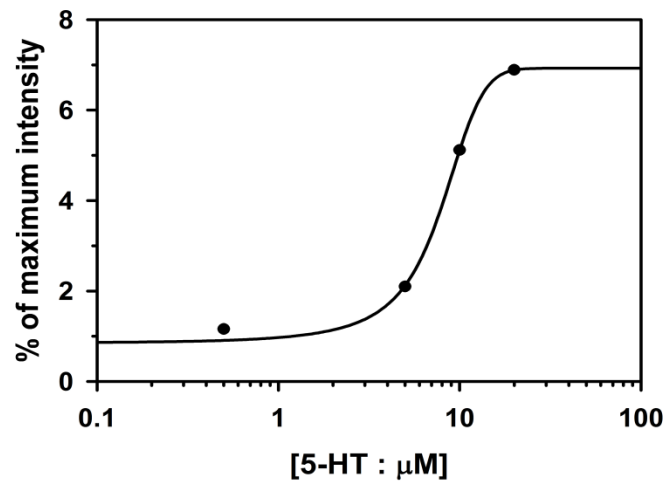

**Figure S1. 5-HT dependent release of  $\text{Ca}^{2+}$  ions from proteoliposomes containing P9-5-HT<sub>3A</sub>.** The percentage release of  $\text{Ca}^{2+}$  from proteoliposomes were plotted against the concentration of 5-HT.

**Figure S2**

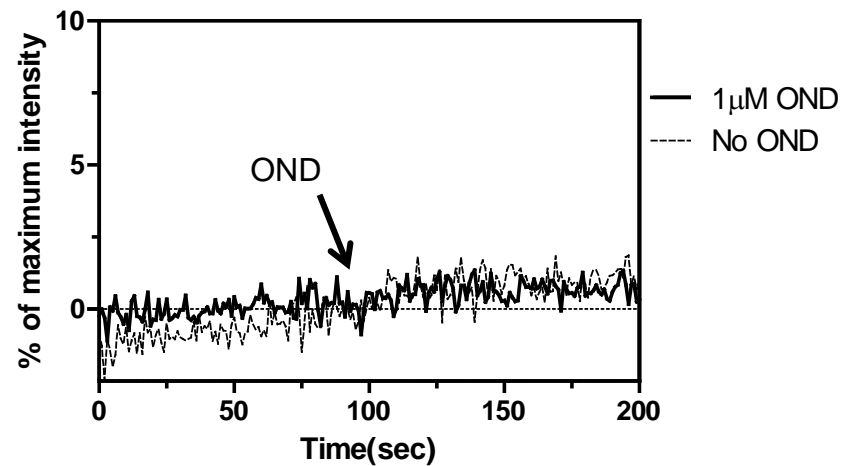

**Figure S2. Effect of ondansetron on the Ca<sup>2+</sup> ions release from the proteoliposomes containing P9-5-HT<sub>3A</sub>.** The percentage release of Ca<sup>2+</sup> from proteoliposomes containing wild-type P9-5-HT<sub>3A</sub> was measured at 25°C in the presence (solid line) or absence (broken line) of 1.0 μM of ondansetron. The time point of the addition of 1.0 μM ondansetron is indicated by the arrow.
